# Supplementary material for: Dynamically controllable polarity modulation of MoTe2 field-effect transistors through ultraviolet light and electrostatic activation
Source: PubMed Central journal article supplement — Sci Adv. 2019 May 3;5(5):eaav3430. doi: 10.1126/sciadv.aav3430 (PMC6499594; doi:10.1126/sciadv.aav3430), 2019-05-03
Supplement: aav3430_SM.pdf [file aav3430_SM.pdf]

## Supplementary Materials for

### **Dynamically controllable polarity modulation of MoTe<sub>2</sub> field-effect transistors through ultraviolet light and electrostatic activation**

Enxiu Wu, Yuan Xie, Jing Zhang, Hao Zhang, Xiaodong Hu, Jing Liu\*, Chongwu Zhou\*, Daihua Zhang\*

\*Corresponding author. Email: jingliu\_1112@tju.edu.cn (J.L.); chongwuz@usc.edu (C.Z.); zhangdaihua@gmail.com (D.Z.)

Published 3 May 2019, *Sci. Adv.* **5**, eaav3430 (2019)

DOI: 10.1126/sciadv.aav3430

#### **This PDF file includes:**

Supplementary Materials and Methods

Fig. S1. AFM images of devices.

Fig. S2. Output characteristic curves of device A and device B.

Fig. S3. Position of MCP versus writing voltage in the p-type and n-type doping processes.

Fig. S4. Transfer characteristics of four other MoTe<sub>2</sub> samples under different doping conditions.

Fig. S5. Transfer characteristics of WSe<sub>2</sub> and MoS<sub>2</sub> under different doping conditions.

Fig. S6. Transfer characteristics of MoTe<sub>2</sub> on SiO<sub>2</sub> substrate under different conditions.

Fig. S7. Doping behaviors of the MoTe<sub>2</sub>/BN device under visible light illumination.

Fig. S8. Dynamic response characteristics of device C at different  $V_{ds}$ .

## Supplementary Materials and Methods

### S1. Atomic force microscopy (AFM) characterization of the device

AFM measurements indicate that the thicknesses of MoTe<sub>2</sub> and h-BN are around 28 nm and 11.5 nm, respectively, as shown in fig. S1.

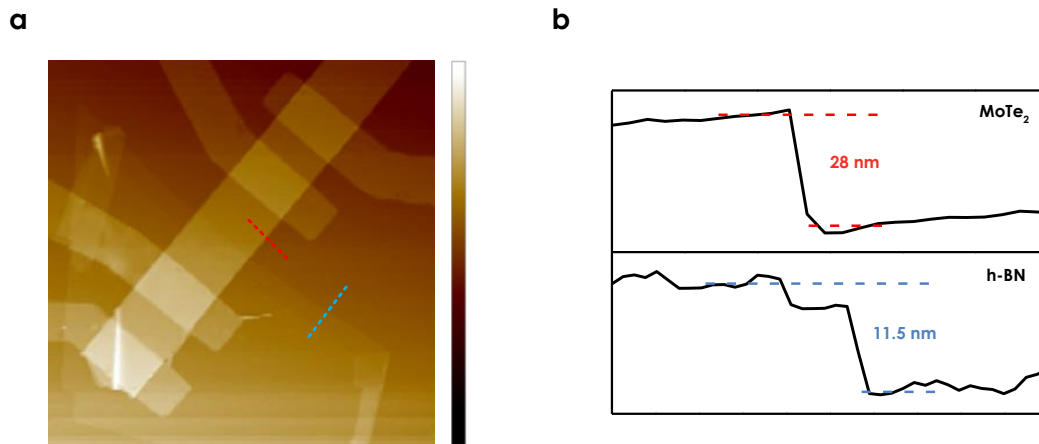

**Fig. S1. AFM images of devices.** (a) AFM image of the whole device. (b) Height images of the different regions as highlighted on the device.

### S2. Output characteristic curves of Device A and B at different $V_{gs}$ under different light illumination

Notably, as shown in fig. S2d, output characteristics of Device B at different  $V_{gs}$  under UV illumination exhibited almost negligible gate modulation with source-drain current of pA level, which is consistent with transfer characteristic as shown in Fig. 1e.

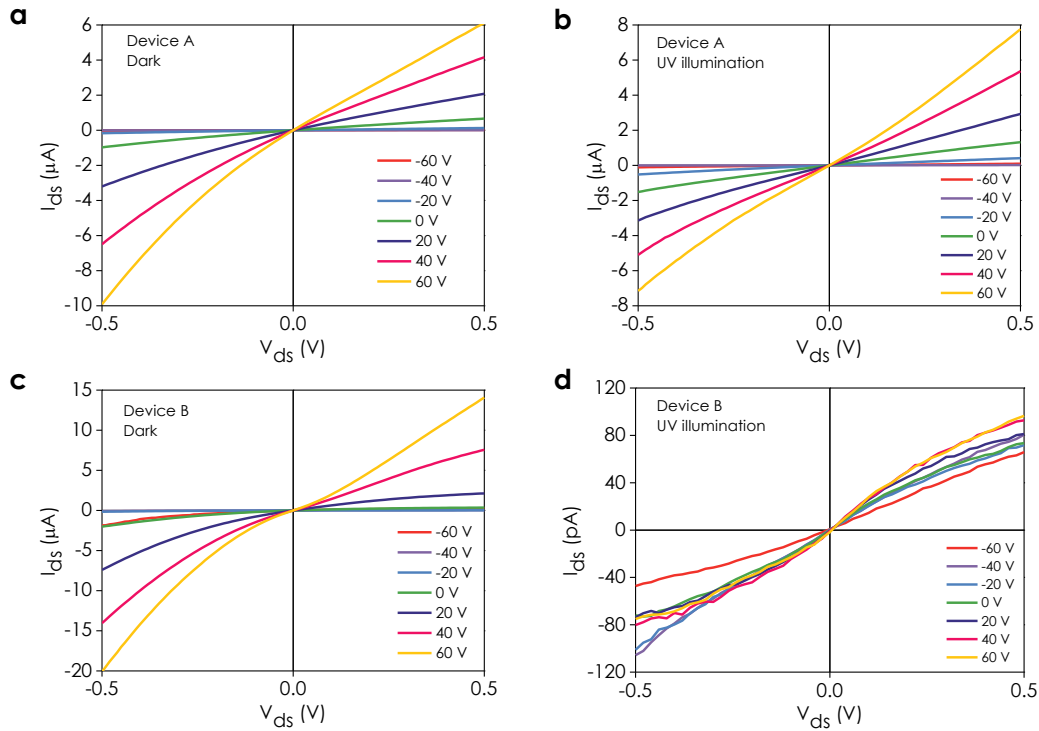

**Fig. S2. Output characteristic curves of device A and device B.** Output characteristics of Device A in dark (a) and UV illumination (b), respectively. Output characteristics of Device B in dark (c) and UV illumination (d) respectively.

**S3. Position of minimum conduction point (MCP) versus writing voltage in p-type and n-type doping processes**

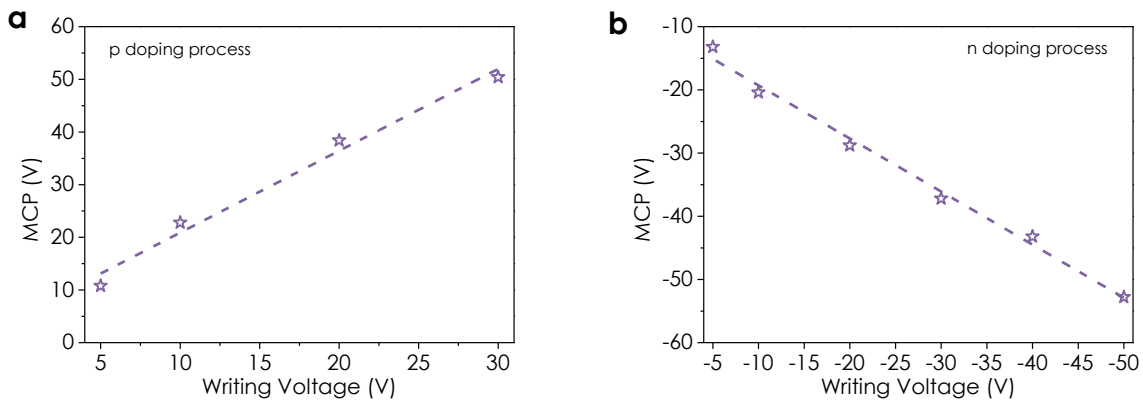

**Fig. S3. Position of MCP versus writing voltage in the p-type and n-type doping processes.** Position of minimum conduction point in p-type doping (a) and n-type doping (b) processes extracted from

transfer characteristic curves in Fig. 2a and c. Data points for writing voltages of  $V_{gs} > +30$  V and  $V_{gs} < -60$  V are missing as the device became completely unipolar in these regions.

#### **S4. Transport properties of photo-doped MoTe<sub>2</sub>/BN devices with different thicknesses of MoTe<sub>2</sub> and BN**

As shown in fig. S4, the thickness of BN ranges from 5.6 to 24 nm, while the thickness of MoTe<sub>2</sub> ranges from 4.0 to 28 nm. Consistently with the text, the original devices exhibited ambipolar transport property. We exposed the devices to UV illumination for 1 second at writing voltage = 60 V (writing voltage = -60 V) to achieve p-type doping (n-type doping) of devices, which indicates excellent reproducibility of this doping process.

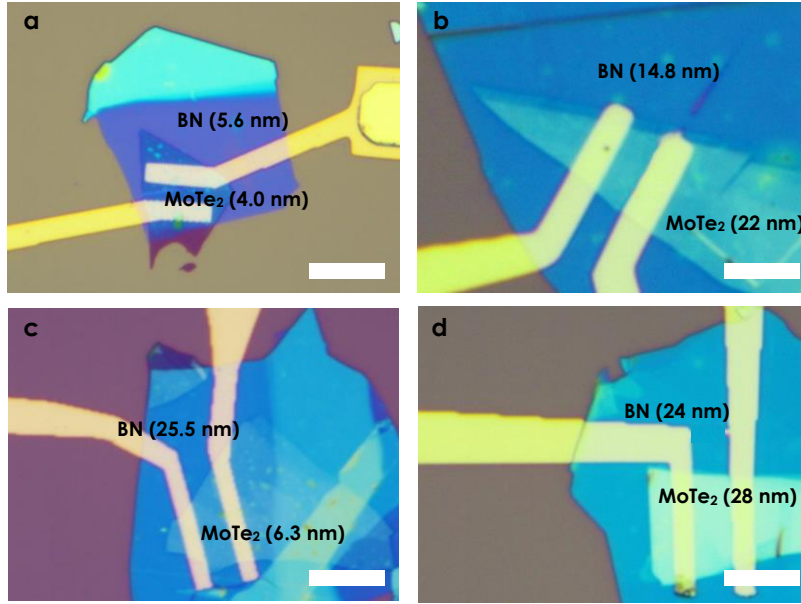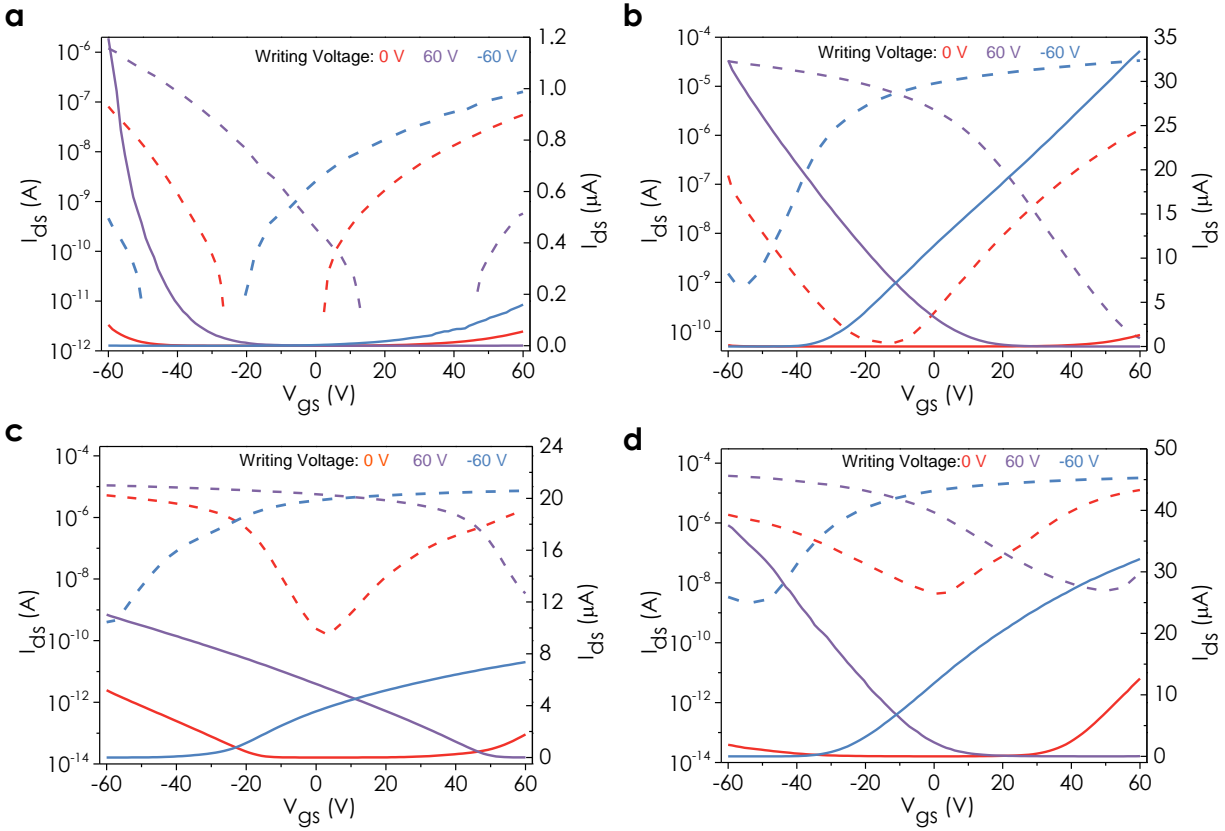

**Fig. S4. Transfer characteristics of four other MoTe<sub>2</sub> samples under different V doping conditions.**

(a), (b), (c), (d) Optical microscopy images and corresponding transfer characteristics of four other sample devices under different doping condition.

### S5. Transport properties of photo-doped WSe<sub>2</sub>/BN and MoS<sub>2</sub>/BN heterostructure

The WSe<sub>2</sub>-based transistors exhibit ambipolar transfer characteristic as shown in red curves of fig. S5b. The WSe<sub>2</sub>/h-BN device exhibits significant p-type and n-type enhancement after being exposed to UV illumination for 1 second at writing voltage = 0 V, 60 V, -60 V, respectively. Due to the strong pinning effect at metal-MoS<sub>2</sub> interface, the p-type MoS<sub>2</sub> transistors are seldomly achieved. We also face the same predicament using this doping technology, as shown in fig. S5d. After exposing MoS<sub>2</sub>/h-BN device in UV illumination for 1 second at writing voltage = 60 V, the p-regime of MoS<sub>2</sub> shows negligible enhancement, but the current of n-regime of MoS<sub>2</sub> decrease evidently.

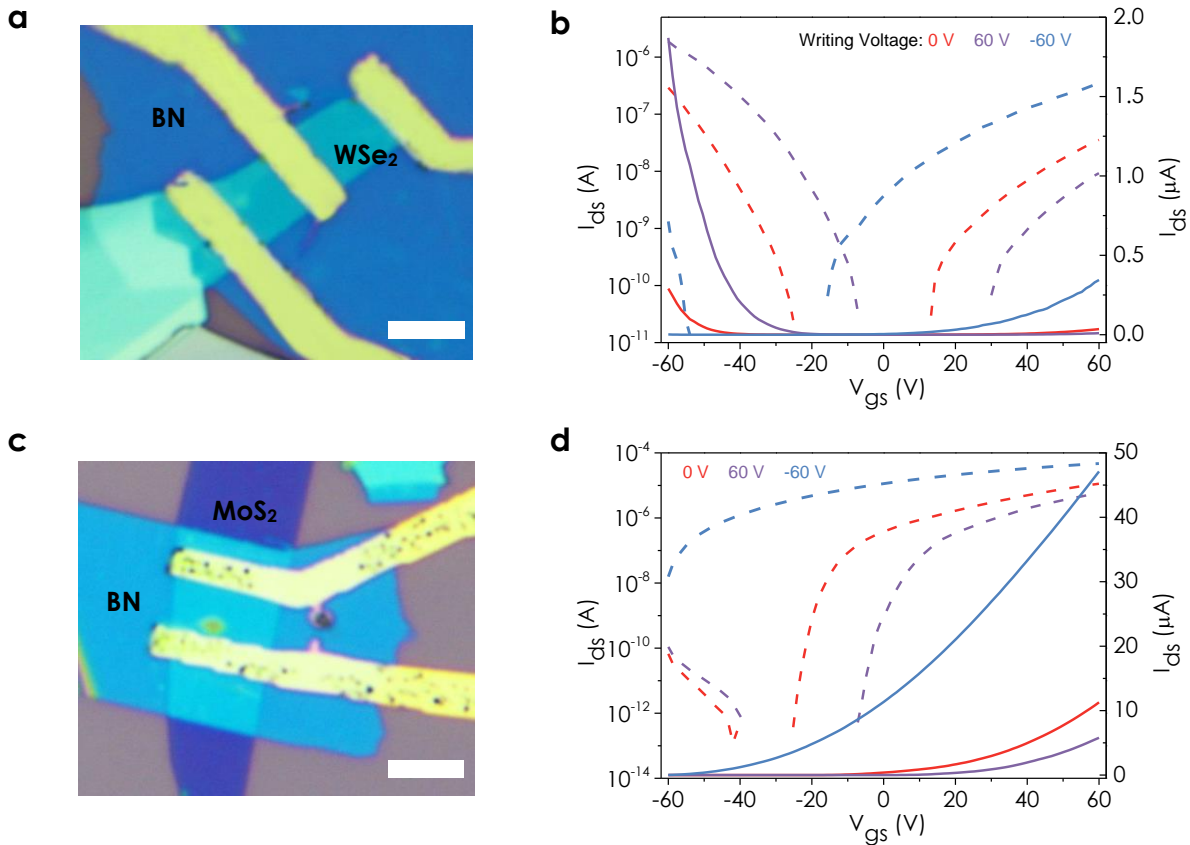

**Fig. S5. Transfer characteristics of WSe<sub>2</sub> and MoS<sub>2</sub> under different doping conditions.** Optical microscopy images of fabricated WSe<sub>2</sub>/h-BN (a) and MoS<sub>2</sub>/h-BN (c) devices. Scale bar is 5  $\mu$ m. Transport characteristics of WSe<sub>2</sub>/h-BN (b) and MoS<sub>2</sub>/h-BN (d) after photoinduced modulation doping.

## S6. Transport properties of MoTe<sub>2</sub> on bare SiO<sub>2</sub> substrate under different various doping conditions

As shown in fig. S6, the red trace is the transfer characteristic of MoTe<sub>2</sub> device in the darkness. The violet and blue traces are transfer characteristics of MoTe<sub>2</sub> device after being exposed to UV light for 1 seconds at writing voltage = 0 V, -60 V and 60 V, respectively. We found that there was no p/n-doping effect in device, which indicates that the h-BN plays an important role in the UV-induced doping process.

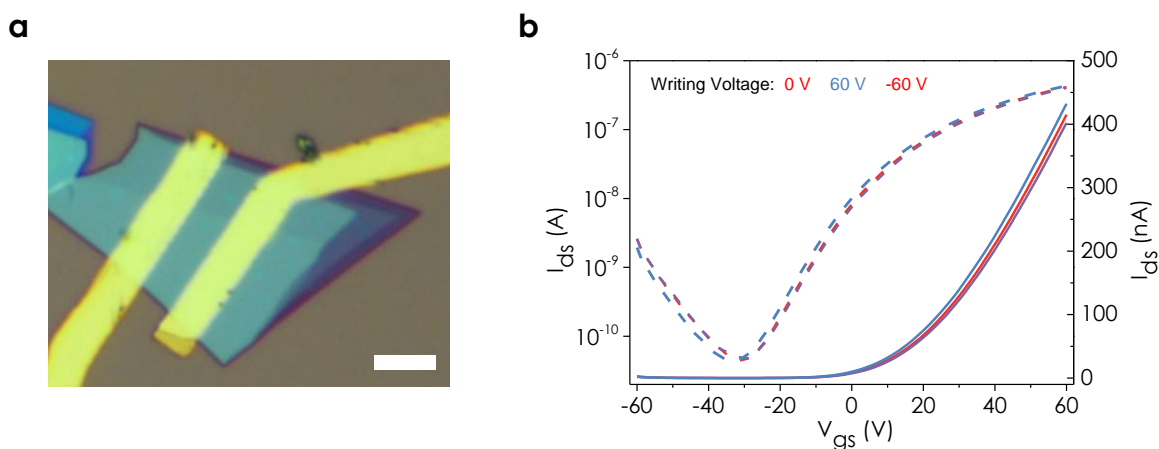

**Fig. S6. Transfer characteristics of MoTe<sub>2</sub> on SiO<sub>2</sub> substrate under different conditions.** (a) Optical microscopy image of MoTe<sub>2</sub> transistor on SiO<sub>2</sub> substrate. (b) Transport properties of MoTe<sub>2</sub> on bare SiO<sub>2</sub> substrate under different doping conditions.

## S7. Doping behaviors of the MoTe<sub>2</sub>/BN device under visible light illumination

We explore the doping behaviors of MoTe<sub>2</sub>/BN device under visible light illumination for 5 min at writing voltage = 0 V, -60 V and 60 V, respectively. The wavelengths of visible light are 400 nm and 500 nm, respectively.

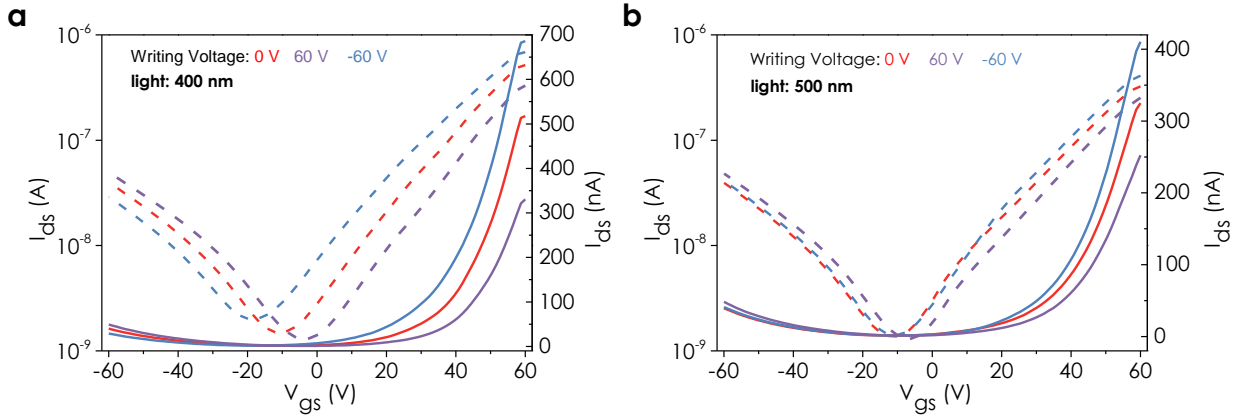

**Fig. S7. Doping behaviors of the MoTe<sub>2</sub>/BN device under visible light illumination.** Transfer characteristics of MoTe<sub>2</sub>/BN device after being exposed to visible light illumination at wavelength of 400 nm (a) and 500 nm (b), respectively.

**S8. Dynamic photo-response of the device at different V<sub>ds</sub>**

Figure S8 shows dynamic photo-response of the device. The power of incident light is 1.25 nW. At V<sub>ds</sub> = 0 V, the response time of device is ~ 2 ms. The device exhibited positive photoresponse and showed a maximum photo-detection responsivity of 31.4 A/W at V<sub>ds</sub> = 1 V. Moreover, the response time is shorter than 200 us, significantly enhanced by one order of magnitude compared with the response at V<sub>ds</sub> = 0 V.

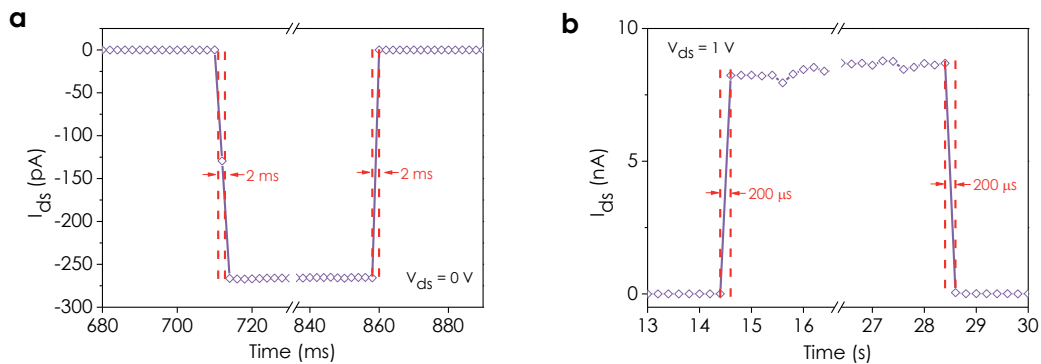

**Fig. S8. Dynamic response characteristics of device C at different V<sub>ds</sub>.** Dynamic photo-response of the device at V<sub>ds</sub> = 0 V (a) and V<sub>ds</sub> = 1 V (b), respectively.
